# Supplementary material for: TCR Coexpression Signature Predicts Immunotherapy Resistance in NSCLC
Source: Front Pharmacol. 2022 May 4;13:875149. doi: 10.3389/fphar.2022.875149 (PMC9114764; doi:10.3389/fphar.2022.875149)
Supplement: Supplementary file 1 [file Table1.XLSX]

## Sheet: Supplementary Table 1
gene
PTPRCAP
CD3G
CD3D
CD3E
IL2RB
LCK
GPR18
CCR7
IL7R
GRAP2
ITK
CD6
IKZF3
LAMP3
CRTAM
CD8A
CD8B
TIGIT
CD247
